# Supplementary material for: Presynaptic Nrxn3 is essential for ribbon-synapse assembly in hair cells
Source: PubMed Central journal article supplement — bioRxiv. 2024 Feb 15:2024.02.14.580267. Preprint. [Version 1] doi: 10.1101/2024.02.14.580267 (PMC10896334; doi:10.1101/2024.02.14.580267), 2024-02-15
Supplement: NIHPP2024.02.14.580267v1-supplement-1.pdf [file NIHPP2024.02.14.580267v1-supplement-1.pdf]

1084 **Supplemental Figures and Legends**

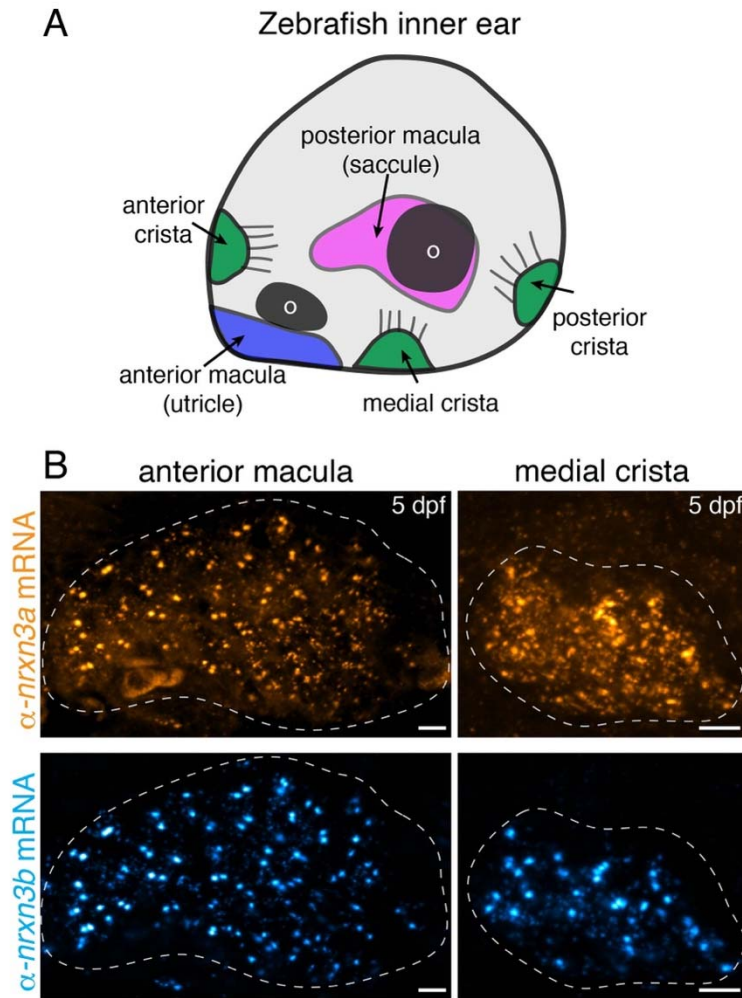

1085

1086 **Fig S1. *nrxn3a* and *nrxn3b* mRNAs are present in zebrafish inner-ear hair cells**

1087 (A) Schematic showing a larval zebrafish inner ear. Within the inner ear, clusters of hair cells are

1088 present in 3 cristae and 2 maculae. Each macula is associated with an otolith (o). (B) RNA FISH

1089 analysis reveals that both  $\alpha$ -*nrxn3a* (orange) and  $\alpha$ -*nrxn3b* (cyan) mRNAs are present in inner-

1090 ear hair cells. The dashed line in B outlines the locations of hair cells within the sensory

1091 epithelium. Images are from larvae at 5 dpf. Scale bars = 5  $\mu$ m in B.

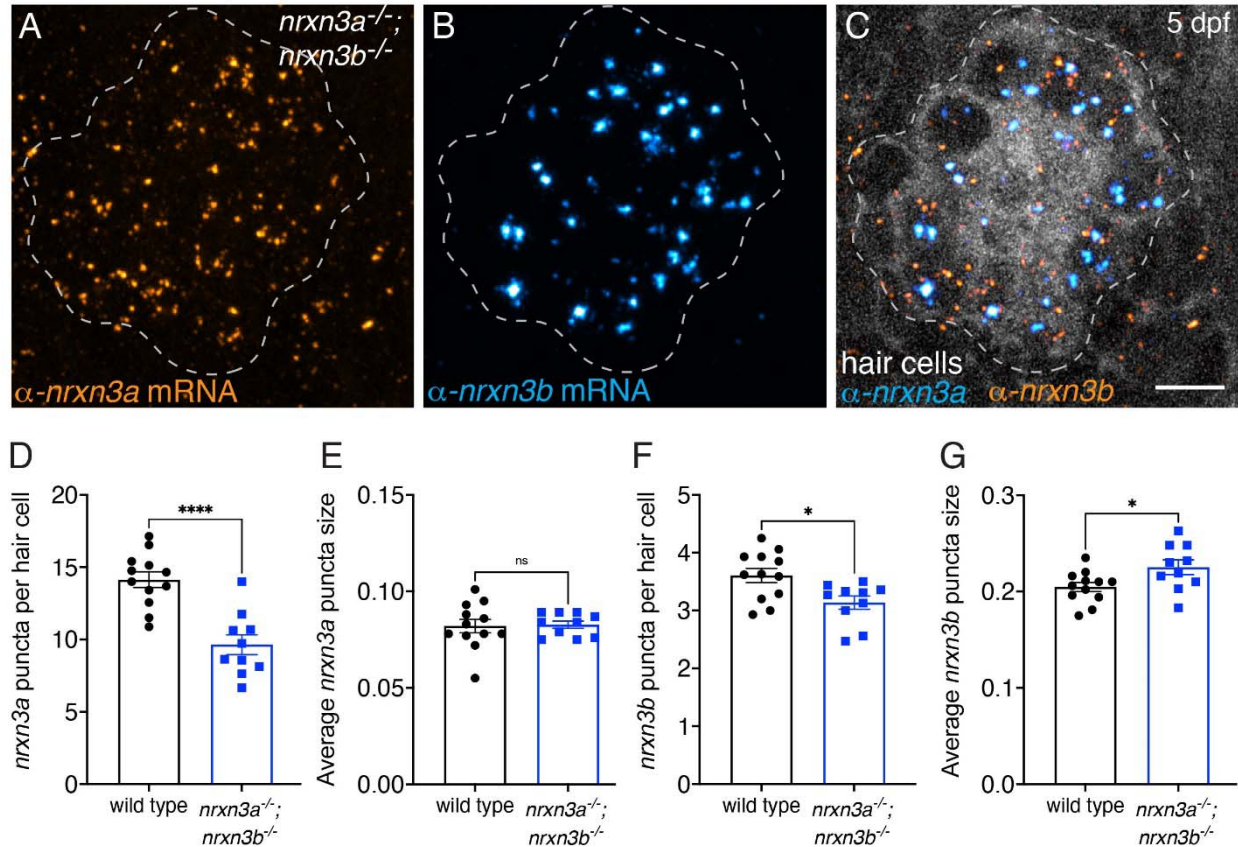

1092

1093 **Fig S2. *nrxn3a* and *nrxn3b* mRNAs are reduced in lateral-line hair cells in zebrafish *nrxn3a*;**

1094 ***nrxn3b* mutants**

1095 (A-C) RNA FISH reveals that both  $\alpha$ -*nrxn3a* (A, orange) and  $\alpha$ -*nrxn3b* (B, cyan) mRNAs are

1096 present in lateral-line hair cells of *nrxn3a*; *nrxn3b* mutants. In C, hair cells

1097 (*myo6b:memGCaMP6s*) are labeled in grayscale. The dashed lines in A-C outline the locations of

1098 hair cells. (D-G) Quantification reveals that the number of  $\alpha$ -*nrxn3a* (D) and  $\alpha$ -*nrxn3b* (F) puncta

1099 are reduced in *nrxn3a*; *nrxn3b* mutants compared to wild-type controls. In addition, the size of

1100  $\alpha$ -*nrxn3b* (G), but not  $\alpha$ -*nrxn3a* (E) puncta are slightly larger in *nrxn3a*; *nrxn3b* mutants

1101 compared to wild-type controls. An unpaired t-test was used in D-G, n = 12 wild-type and 10

1102 *nrxn3a*; *nrxn3b* mutant neuromasts at 5 dpf. ns P > 0.05, \*P < 0.05, \*\*\*\*P < 0.0001. Scale bar =

1103 5  $\mu$ m in C.

1104

1105

1106

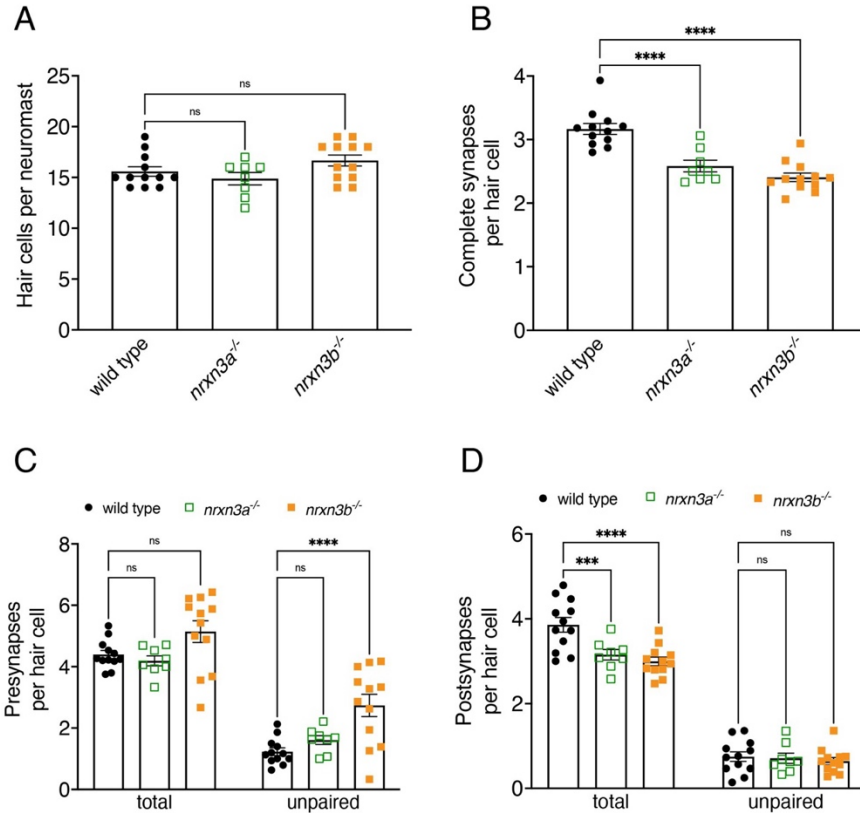

1107

1108 **Fig S3. Minor defects in synapse organization are observed in *nrxn3a* and *nrxn3b* single**  
 1109 **mutants in mature hair cells at 5 dpf.**

1110 (A-F) Quantification reveals that both *nrxn3a* and *nrxn3b* single mutants have a similar number  
 1111 of hair cells per neuromast compared to wild-type controls (A). There are significantly fewer  
 1112 complete synapses per hair cell in *nrxn3b* and *nrxn3a* single mutants compared to wild-type  
 1113 controls (B). The total number of pre-synapses are the same across all genotypes but there are  
 1114 significantly more unpaired presynapses in *nrxn3b* mutants (C). The total number of  
 1115 postsynapses per hair cell is significantly reduced in both in *nrxn3b* and *nrxn3a* single mutants  
 1116 compared to wild-type controls. In contrast, the number of unpaired postsynapses per hair cell  
 1117 is the same across all genotypes (D). N = 12 wild-type, 8 *nrxn3a* and 12 *nrxn3b* mutant  
 1118 neuromasts in A-D at 5 dpf. A one-way ANOVA was used in A-B, while a 2-way ANOVA was used  
 1119 in C-D. ns P > 0.05, \*P < 0.05, \*\*\*P < 0.001, \*\*\*\*P < 0.0001.

1120

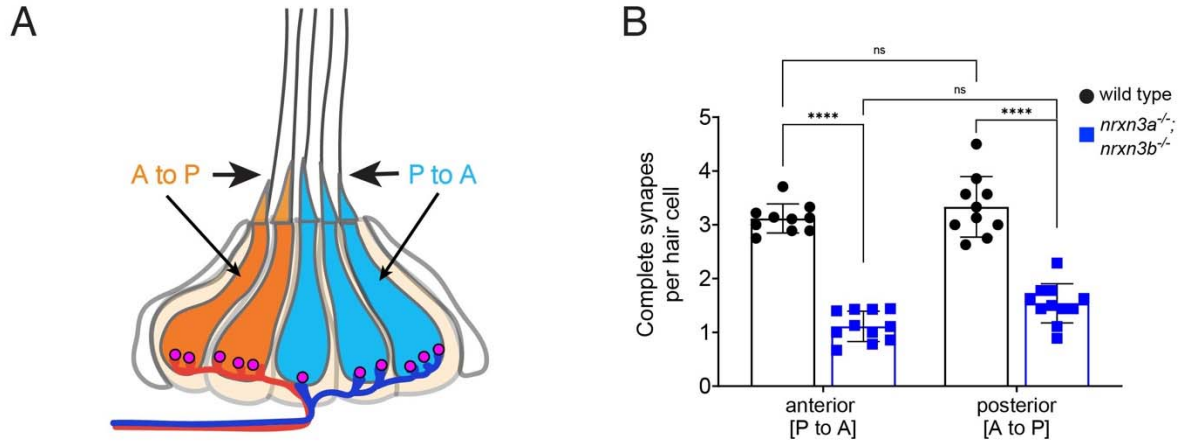

1121

1122 **Fig S4. Synapse loss in mature hair cells is not linked to hair-cell orientation**

1123 **(A-B)** In primary posterior lateral-line neuromasts there are two populations of hair cells. One  
1124 responds to anterior flow (blue, A), while the other responds to posterior flow (orange, A). Each  
1125 population is selectively innervated by distinct afferent neurons (blue and orange processes).  
1126 There is a significant and equivalent reduction in the number of complete synapses in hair cells  
1127 that respond to anterior and posterior flow in *nrxn3a*; *nrxn3b* mutants compared to wild-type  
1128 controls (B). N = 10 wild-type and 11 in *nrxn3a*; *nrxn3b* mutant neuromasts at 5 dpf. A 2-way  
1129 ANOVA was used in B. ns P > 0.05, \*\*\*\*P < 0.0001.

1130

1131

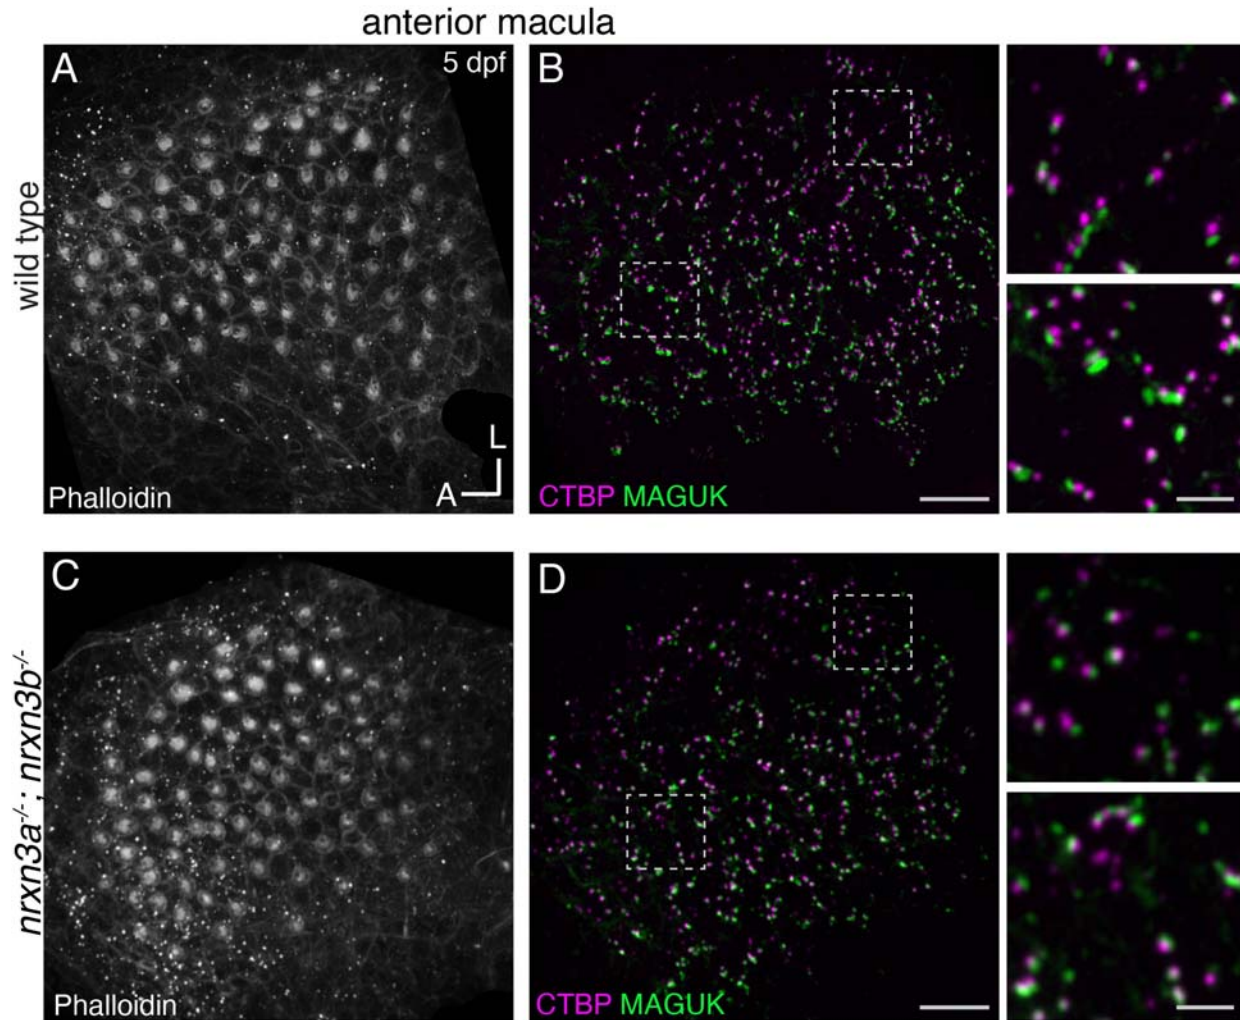

1132

1133 **Fig S5. Loss of Nrnx3 results in fewer synapses hair cells in the zebrafish anterior macula**

1134 (A-D) Confocal images of the anterior macula (utricle) in wild-type controls (A-B, top panels)

1135 and *nrxn3a*; *nrxn3b* mutants (C-D, bottom panels). Phalloidin labels the apical hair bundles (A,C)

1136 while CTBP labels the presynapses (magenta), and MAGUK labels postsynapses (green) in B and

1137 D. The dashed lines indicate regions used to create the insets on the right side of panels B and

1138 D. The higher magnification insets show that there are fewer complete synapses in *nrxn3a*;

1139 *nrxn3b* mutants compared to wild-type controls. Images were taken from larvae at 5 dpf. Scale

1140 bars = 10 μm in A-D, 5 μm in the insets.



## Anterior macula

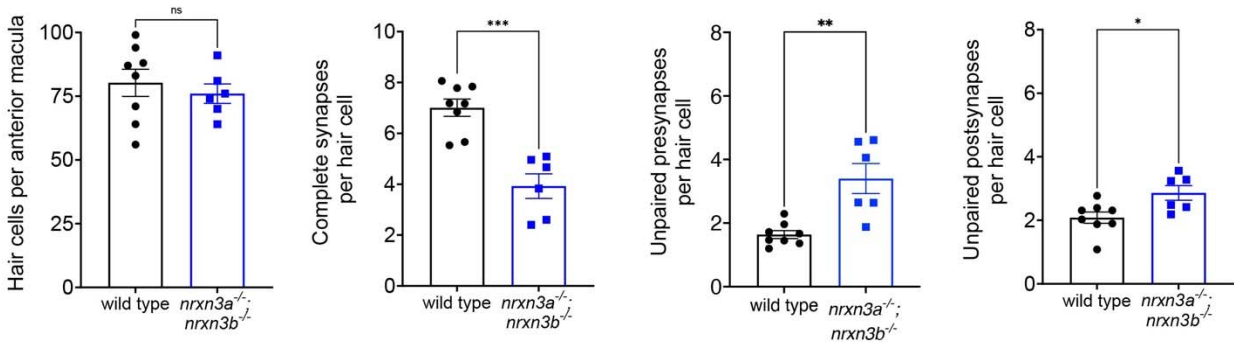

## Medial crista

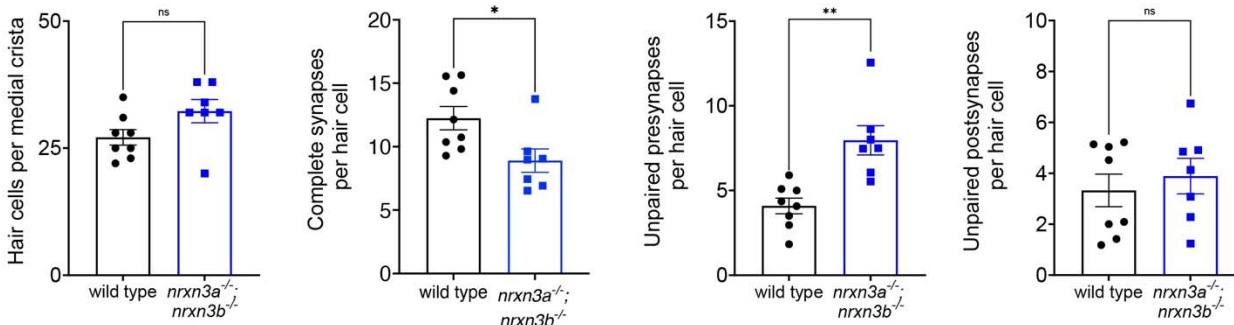

1141

1142 **Fig S6. Quantification of synapse loss in anterior macula and medial crista in *nrxn3a*; *nrxn3b***  
 1143 **mutants**

1144 Quantification reveals that wild-type controls and *nrxn3a*; *nrxn3b* mutants have a similar  
 1145 number of hair cells per anterior macula and medial crista. There are significantly fewer  
 1146 complete synapses per hair cell in each epithelium in *nrxn3a*; *nrxn3b* mutants compared to  
 1147 wild-type controls. Along with fewer complete synapses, there are significantly more unpaired  
 1148 presynapses per hair cell in *nrxn3a*; *nrxn3b* mutants compared to wild-type controls in both the  
 1149 anterior macula and medial crista. There are also more unpaired postsynapses per hair cell in  
 1150 the anterior macula, but not the medial crista in *nrxn3a*; *nrxn3b* mutants compared to wild-type  
 1151 controls. N = 8 wild-type and n = 6 *nrxn3a*; *nrxn3b* mutant anterior maculae, n = 8 wild-type and  
 1152 n = 7 *nrxn3a*; *nrxn3b* mutant medial cristae. Quantifications are from larvae at 5 dpf. An  
 1153 unpaired t-test was used for comparisons. ns P > 0.05, \*P < 0.05, \*\*P < 0.01, \*\*\*P < 0.001.

1154

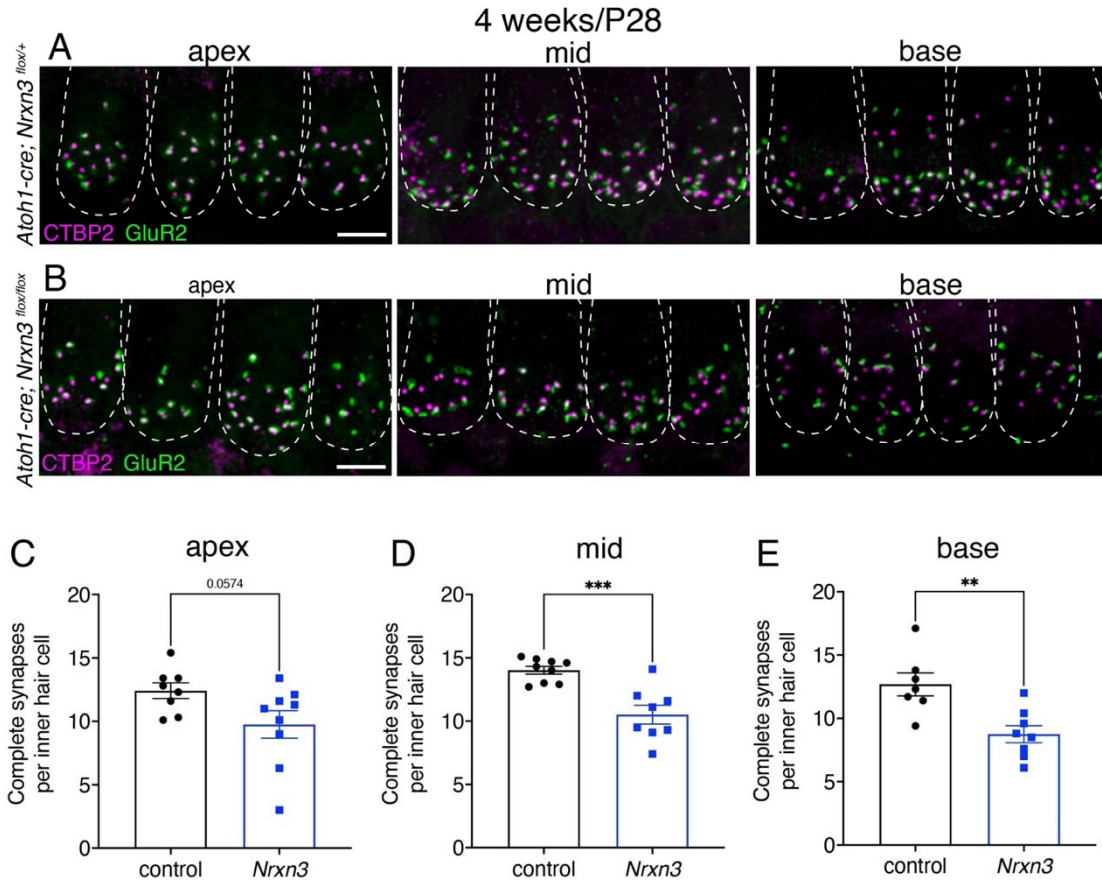

1155

1156 **Fig S7. NRXN3 is required at 4 weeks for proper synapse numbers in mouse auditory inner**  
 1157 **hair cells**

1158 (A-B) Confocal images of 4-week old (P28) mouse inner hair cells from control (A) and *Nrnx3*  
 1159 mutant animals (*Atoh1-Cre; Nrnx3<sup>fllox/flox</sup>*) (B). CTBP2 is used to label the presynapses (magenta),  
 1160 and GluR2 is used to label the postsynapses (green). Merged images show 4 IHCs from 3  
 1161 different regions of the cochlea (apex, middle, basal thirds) for each genotype. Dashed lines  
 1162 indicate the outlines of hair-cell bodies in each image. (C-E) Quantification reveals that  
 1163 compared to controls, *Nrnx3* mutants have significantly fewer complete synapses per inner hair  
 1164 cell at the mid (D) and base (E), and a reduced but not significant decrease at the apex (C). N =  
 1165 61 control and 58 *Nrnx3* IHCs for the apex region, 65 control and 59 *Nrnx3* IHCs for the for mid  
 1166 region, 50 control and 60 *Nrnx3* IHCs for the for base region. These findings were compiled  
 1167 from 4 animals from each genotype. An unpaired t-test was used in C-E. \*\*P < 0.01, \*\*\*P <  
 1168 0.001. Scale bar = 5  $\mu$ m in A.

1169

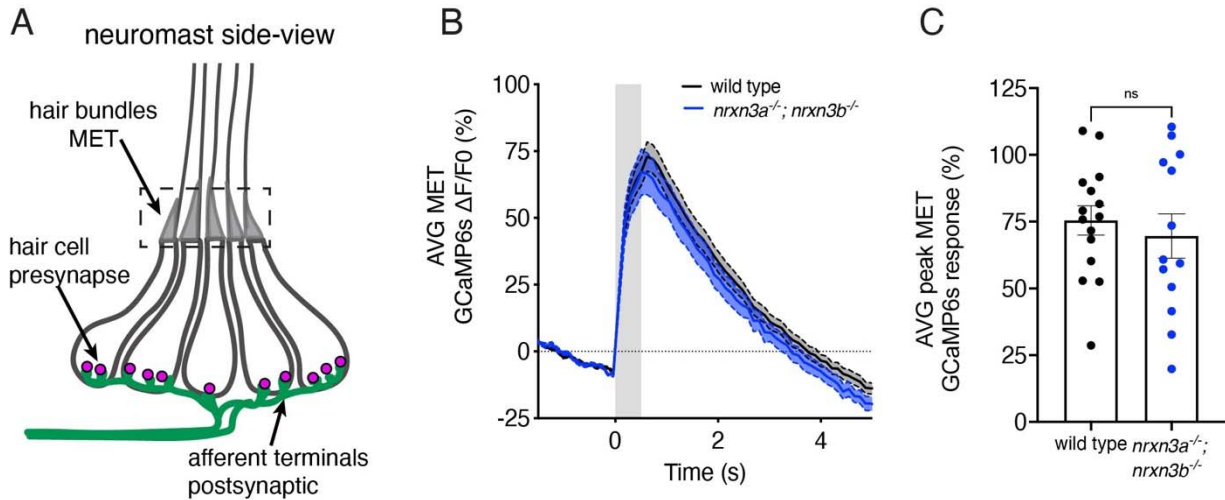

1170

1171 **Fig S8. Loss of Nrnx3 does not impact the magnitude of mechanosensitive responses in**  
1172 **lateral-line hair cells.**

1173 **(A)** Schematic of a neuromast shown from the side. The region used to measure  
1174 mechanosensitive GCaMP6 responses (MET) in apical hair bundles is indicated with a dashed  
1175 box. **(B)**  $\Delta F/F_0$  GCaMP6s traces showing average MET GCaMP6 response during a 500 ms fluid-  
1176 jet stimulation (grey area) for wild-type controls (black) and *nrnx3a*<sup>-/-</sup>; *nrnx3b*<sup>-/-</sup> mutants (blue).  
1177 Traces are displayed as mean, dashed lines are SEM. **(C)** Maximum  $\Delta F/F_0$  MET calcium GCaMP6  
1178 during stimulation for wild-type controls (black) and *nrnx3a*<sup>-/-</sup>; *nrnx3b*<sup>-/-</sup> mutants (blue). N = 15  
1179 wild-type and 13 *nrnx3a*<sup>-/-</sup>; *nrnx3b*<sup>-/-</sup> mutant neuromasts at 5-6 dpf. An unpaired t-test was used in  
1180 C. ns P > 0.05.

1181

1182

1183

1184

1185

1186

1187

1188

1189



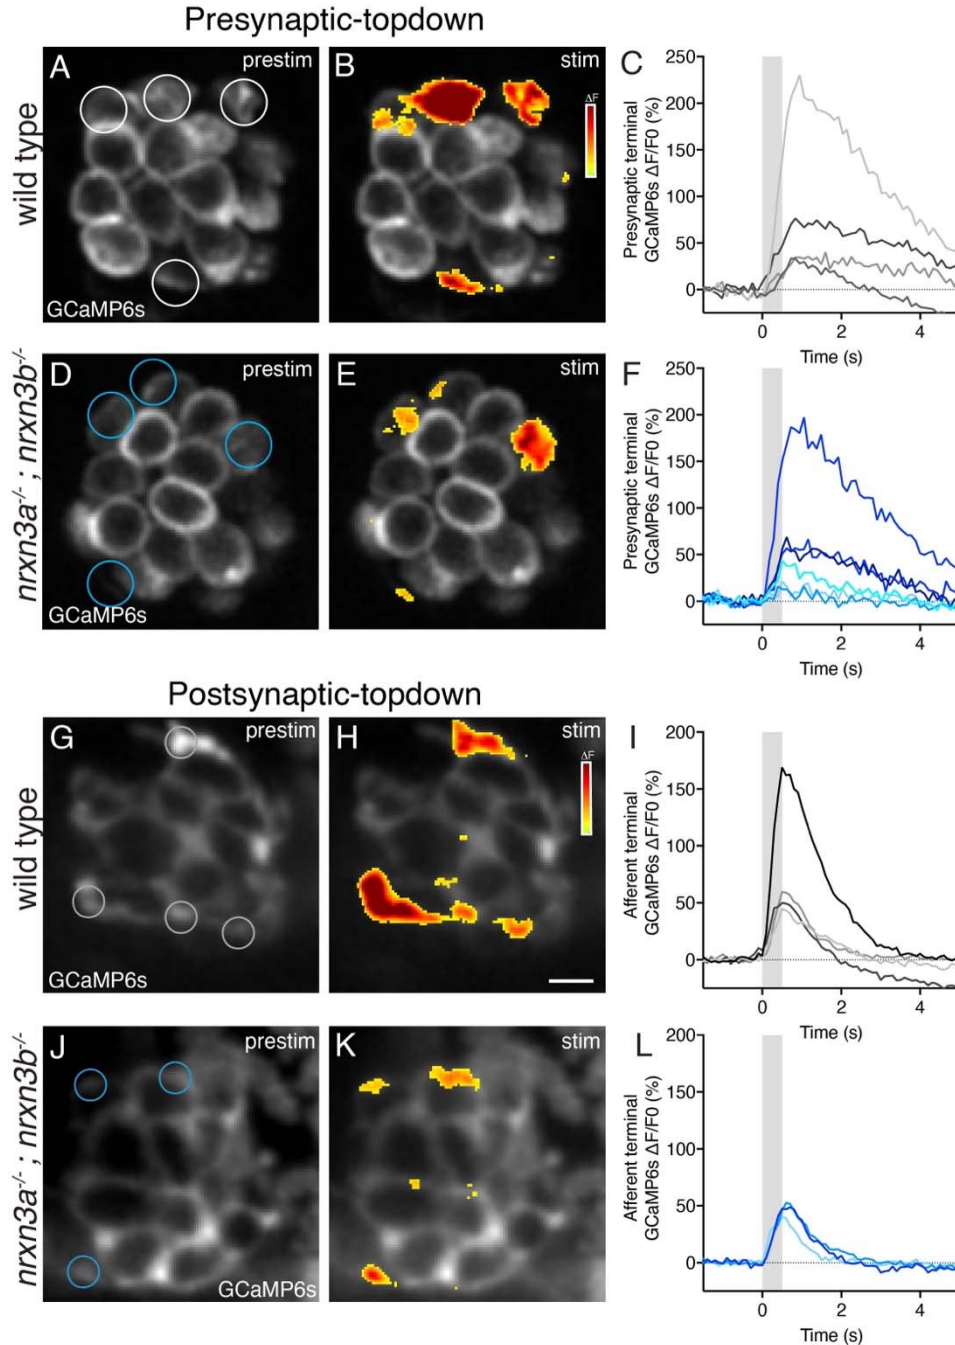

1197 patterns of postsynaptic GCaMP6s increases in hair cells before (G,J) and during (H,K) a 500 ms  
1198 fluid-jet stimulation in a wild-type (G,H) and *nrxn3a; nrxn3b* mutant (J,K) neuromast. ROIs  
1199 indicate synaptically active terminals and examples of regions used to measure the average  
1200 terminal response per neuromast. Traces in I and J show  $\Delta F/F$  responses from ROIs in G and J.  
1201 Gray area indicates timing of stimulus. Wild-type examples in A-B and G-H correspond to the  
1202 same example in Fig 6 C,D and G,H.  
1203  
1204
